# Supplementary material for: Light scattering evidence of selective protein fouling on biocompatible block copolymer micelles
Source: Royal Society of Chemistry journal article supplement (doi:10.1039/c2nr30623a), 2012-01-01
Supplement: c2nr30623a.pdf [file c2nr30623a.pdf]

Supplementary Information for the Manuscript Entitled

# Light Scattering Evidences of Selective Protein Fouling on Biocompatible Block Copolymer Micelles

**Fernando C. Giacomelli,<sup>\*a</sup> Petr Stepánek,<sup>b</sup> Vanessa Schmidt,<sup>c</sup> Eliézer Jäger,<sup>b</sup> Alessandro  
Jäger<sup>b</sup> and Cristiano Giacomelli<sup>c</sup>**

<sup>a</sup> *Centro de Ciências Naturais e Humanas, Universidade Federal do ABC, 09210-170 Santo  
André, Brazil*

<sup>b</sup> *Institute of Macromolecular Chemistry, Heyrovsky Sq. 2, 162 06 Prague 6, Czech Republic*

<sup>c</sup> *Departamento de Química, Universidade Federal de Santa Maria, 97105-900 Santa Maria,  
Brazil*

\*Corresponding Author: Fernando Carlos Giacomelli  
e-mail. [fernando.giacomelli@ufabc.edu.br](mailto:fernando.giacomelli@ufabc.edu.br)  
Tel. +55 11 4996 8361  
Fax. +55 11 4996 8361

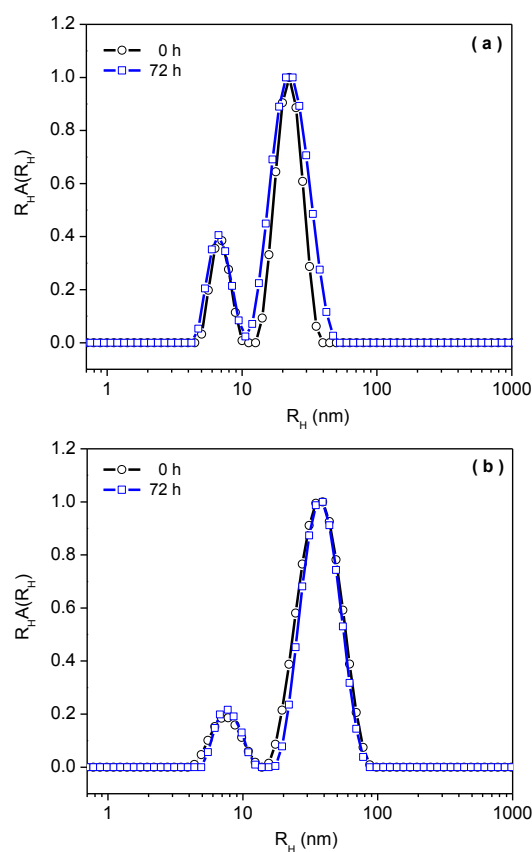

**Figure S1.** Distributions of  $R_H$  for PEO<sub>113</sub>-*b*-PG2MA<sub>30</sub>-*b*-PDPA<sub>50</sub> (a) and PMPC<sub>40</sub>-*b*-PDPA<sub>70</sub> (b) micelles (1.0 mg/mL) in presence of IgG (10.0 mg/mL) at  $t = 0$  (○) h and  $t = 72$  h (□).

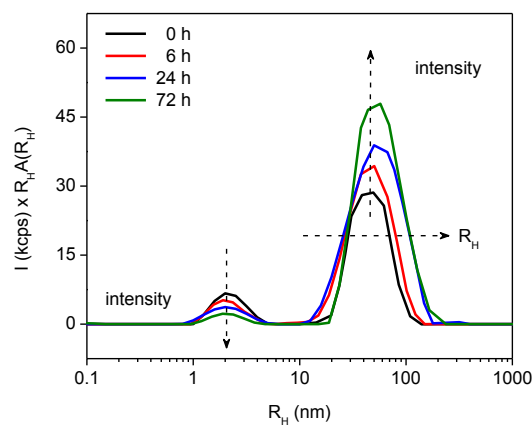

**Figure S2.** Distribution of  $R_H$  for PMPC<sub>40</sub>-*b*-PDPA<sub>70</sub> micelles (1.0 mg. mL<sup>-1</sup>) in presence of lysozyme (5.0 mg.mL<sup>-1</sup>) as a function of time.
